# Supplementary material for: EnhancerPred: a predictor for discovering enhancers based on the combination and selection of multiple features
Source: PubMed Central journal article supplement (PMC5150536; doi:10.1038/srep38741), 2016-12-12
Supplement: srep38741-s1.pdf [file srep38741-s1.pdf]

# **EnhancerPred: a predictor for discovering enhancers based on the combination and selection of multiple features**

CangzhiJia\*, Wenyong He

Department of Mathematics, Dalian Maritime University, No. 1 Linghai Road, Dalian 116026,  
China;

\*Corresponding author. Email: cangzhijia@dlnu.edu.cn

Table S1 F-score values of nucleotide composition.

| Nucleotide | F-score |
|------------|---------|
| A          | 0.158   |
| T          | 0.193   |
| G          | 0.234   |
| C          | 0.236   |

Table S2 104 features from BPB combined with NC.

| Features            | Sn(%) | Sp(%) | Acc(%) | MCC(%) |
|---------------------|-------|-------|--------|--------|
| BPB(104)+ $f_C$     | 71.02 | 83.02 | 77.02  | 0.5444 |
| BPB(104)+ $f_C+f_G$ | 71.36 | 82.41 | 76.89  | 0.5410 |

Table S3 Predictive performances of models trained on features selected by different F-score thresholds of PseNC and BPB(104)+ $f_C$  for identifying enhancers and non-enhancers.

| Threshold   | Number of features from PseNC | Sn(%)        | Sp(%)        | Acc(%)       | MCC           |
|-------------|-------------------------------|--------------|--------------|--------------|---------------|
| 0.01        | 55                            | 71.29        | 82.95        | 77.12        | 0.5462        |
| 0.02        | 49                            | 71.29        | 82.88        | 77.09        | 0.5455        |
| 0.03        | 47                            | 71.36        | 82.88        | 77.12        | 0.5461        |
| 0.04        | 39                            | 71.36        | 82.75        | 77.06        | 0.5446        |
| 0.05        | 32                            | 71.43        | 82.82        | 77.12        | 0.5460        |
| 0.06        | 27                            | 71.70        | 82.82        | 77.26        | 0.5485        |
| 0.07        | 22                            | 71.63        | 82.88        | 77.26        | 0.5486        |
| 0.09        | 20                            | 71.70        | 82.88        | 77.29        | 0.5493        |
| 0.1         | 17                            | 71.90        | 82.48        | 77.19        | 0.5469        |
| 0.12        | 14                            | 71.56        | 82.82        | 77.19        | 0.5473        |
| 0.14        | 12                            | 71.70        | 82.88        | 77.29        | 0.5493        |
| 0.15        | 11                            | 71.77        | 82.82        | 77.29        | 0.5492        |
| <b>0.16</b> | <b>9</b>                      | <b>71.97</b> | <b>82.82</b> | <b>77.39</b> | <b>0.5511</b> |
| 0.17        | 8                             | 71.70        | 82.88        | 77.29        | 0.5493        |
| 0.18        | 6                             | 71.50        | 82.88        | 77.19        | 0.5474        |
| 0.19        | 4                             | 71.36        | 82.88        | 77.12        | 0.5461        |
| 0.2         | 3                             | 71.36        | 82.88        | 77.12        | 0.5461        |

Table S4 Predictive performances of models trained on different number of features from PseNC combined with BPB(104)+ $f_c$  for identifying enhancers and non-enhancers.

| Number of features from PseNC | Sn(%)        | Sp(%)        | Acc(%)       | MCC           |
|-------------------------------|--------------|--------------|--------------|---------------|
| 22                            | 71.63        | 82.88        | 77.26        | 0.5486        |
| 20                            | 71.70        | 82.88        | 77.29        | 0.5493        |
| 18                            | 72.04        | 82.55        | 77.29        | 0.5489        |
| 16                            | 71.90        | 82.48        | 77.19        | 0.5469        |
| 14                            | 71.56        | 82.82        | 77.19        | 0.5473        |
| 12                            | 71.70        | 82.88        | 77.29        | 0.5493        |
| 11                            | 71.77        | 82.82        | 77.29        | 0.5492        |
| 10                            | 71.77        | 82.82        | 77.29        | 0.5492        |
| <b>9</b>                      | <b>71.97</b> | <b>82.82</b> | <b>77.39</b> | <b>0.5511</b> |
| 8                             | 71.70        | 82.88        | 77.29        | 0.5493        |
| 6                             | 71.50        | 82.88        | 77.19        | 0.5474        |
| 4                             | 71.36        | 82.88        | 77.12        | 0.5461        |

Table S5 Predictive performances of models trained on features selected by different F-score thresholds of PseNC and BPB(89) for identifying strong enhancers and weak enhancers.

| Threshold   | Number of features from PseNC | Sn(%)        | Sp(%)        | Acc(%)       | MCC           |
|-------------|-------------------------------|--------------|--------------|--------------|---------------|
| 0.05        | 6                             | 69.81        | 64.29        | 67.05        | 0.3415        |
| 0.04        | 7                             | 69.81        | 63.88        | 66.85        | 0.3375        |
| <b>0.03</b> | <b>8</b>                      | <b>70.35</b> | <b>65.23</b> | <b>67.79</b> | <b>0.3563</b> |
| <b>0.02</b> | <b>16</b>                     | <b>71.02</b> | <b>64.15</b> | <b>67.59</b> | <b>0.3526</b> |
| 0.01        | 25                            | 70.49        | 63.21        | 66.85        | 0.3378        |

Table S6 Predictive performances of models trained on different number of features from PseNC combined with BPB(89) for identifying strong enhancers and weak enhancers.

| Number of features from PseNC | Sn(%)        | Sp(%)        | Acc(%)       | MCC           |
|-------------------------------|--------------|--------------|--------------|---------------|
| 9                             | 70.75        | 65.36        | 68.06        | 0.3617        |
| <b>10</b>                     | <b>71.16</b> | <b>65.23</b> | <b>68.19</b> | <b>0.3645</b> |
| 11                            | 71.02        | 64.69        | 67.86        | 0.3579        |
| 12                            | 71.29        | 64.29        | 67.79        | 0.3567        |
| 14                            | 71.16        | 63.88        | 67.52        | 0.3513        |

Table S7 Comparison prediction results of different k neighbors.

| k         | Sn(%)        | Sp(%)        | Acc(%)       | MCC           |
|-----------|--------------|--------------|--------------|---------------|
| 7         | 59.10        | 86.19        | 72.64        | 0.4704        |
| 15        | 58.96        | 88.68        | 73.82        | 0.4990        |
| <b>23</b> | <b>59.43</b> | <b>89.82</b> | <b>74.63</b> | <b>0.5170</b> |
| 31        | 58.49        | 89.89        | 74.19        | 0.5096        |
| 25        | 59.10        | 89.29        | 74.19        | 0.5075        |
| 27        | 58.96        | 89.35        | 74.16        | 0.5071        |

Table S8 Comparison prediction results of different k neighbors.

| k         | Sn(%)        | Sp(%)        | Acc(%)       | MCC           |
|-----------|--------------|--------------|--------------|---------------|
| 11        | 60.24        | 61.46        | 60.85        | 0.2170        |
| 19        | 63.07        | 62.94        | 63.01        | 0.2601        |
| 27        | 65.63        | 63.34        | 64.49        | 0.2898        |
| 35        | 65.63        | 63.75        | 64.69        | 0.2939        |
| 43        | 67.12        | 64.15        | 65.63        | 0.3128        |
| <b>45</b> | <b>67.79</b> | <b>64.56</b> | <b>66.17</b> | <b>0.3236</b> |
| 47        | 67.25        | 64.42        | 65.84        | 0.3168        |

## Figures

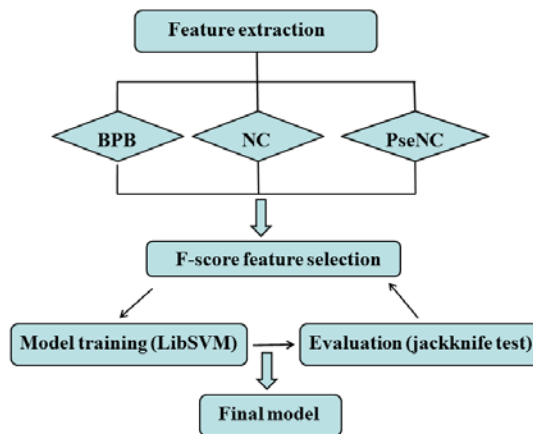

Fig. S1 The flowchart of the features selection.
